# Supplementary material for: Clinical and Economic Outcomes Associated with Cell-Based Quadrivalent Influenza Vaccine vs. Standard-Dose Egg-Based Quadrivalent Influenza Vaccines during the 2018–19 Influenza Season in the United States
Source: PubMed Central journal article supplement (PMC7911861; doi:10.3390/vaccines9020080), 2021-01-23
Supplement: vaccines-09-00080-s001.pdf [file vaccines-09-00080-s001.pdf]

**Supplementary Table 1. Baseline Demographic Characteristics – Unadjusted**

| Characteristic                                                     | QIVc<br>(N=665,047) | QIVe-SD<br>(N=3,062,843) | SMD <sup>1</sup> |
|--------------------------------------------------------------------|---------------------|--------------------------|------------------|
| <b>Mean Age (years)</b>                                            | 41.9                | 35.8                     | -0.31            |
| SD                                                                 | 16.5                | 19.6                     |                  |
| Median                                                             | 45                  | 38                       |                  |
| <b>Age group (%)</b>                                               |                     |                          |                  |
| 4-8 years                                                          | 3.0%                | 11.0%                    | 0.32             |
| 9-17 years                                                         | 8.1%                | 16.4%                    | 0.25             |
| 18-49 years                                                        | 47.4%               | 39.0%                    | -0.17            |
| 50-64 years                                                        | 41.4%               | 33.6%                    | -0.16            |
| <b>Gender (n,%)</b>                                                |                     |                          |                  |
| Male                                                               | 43.4%               | 44.9%                    | 0.03             |
| Female                                                             | 56.6%               | 55.1%                    | -0.03            |
| <b>Payer type (%)</b>                                              |                     |                          |                  |
| Commercial                                                         | 62.7%               | 59.9%                    | -0.06            |
| Medicaid                                                           | 0.1%                | 0.9%                     | 0.11             |
| Medicare Advantage                                                 | 0.0%                | 0.0%                     | 0.02             |
| Self-Insured                                                       | 37.2%               | 39.2%                    | 0.04             |
| <b>Health plan type (%)</b>                                        |                     |                          |                  |
| Consumer directed health care                                      | 0.0%                | 0.1%                     | 0.03             |
| HMO                                                                | 7.6%                | 8.4%                     | 0.03             |
| POS                                                                | 4.8%                | 6.3%                     | 0.07             |
| PPO                                                                | 87.0%               | 84.1%                    | -0.09            |
| Other/Unknown                                                      | 0.5%                | 1.1%                     | 0.06             |
| <b>Geographic region (%)</b>                                       |                     |                          |                  |
| Northeast                                                          | 14.4%               | 17.0%                    | 0.07             |
| Midwest                                                            | 23.7%               | 35.4%                    | 0.26             |
| South                                                              | 51.6%               | 36.2%                    | -0.32            |
| West                                                               | 10.3%               | 11.5%                    | 0.04             |
| <b>DHHS (U.S. Dept. of Health &amp; Human Services) region (%)</b> |                     |                          |                  |
| Region 1: CT, ME, MA, NH, RI, VT                                   | 6.7%                | 6.6%                     | -0.01            |
| Region 2: NJ, NY, PR, VI                                           | 2.6%                | 3.0%                     | 0.02             |
| Region 3: DE, DC, MD, PA, VA, WV                                   | 7.0%                | 9.5%                     | 0.09             |
| Region 4: AL, FL, GA, KY, MS, NC, SC, TN                           | 35.6%               | 21.6%                    | -0.31            |
| Region 5: IL, IN, MI, MN, OH, WI                                   | 16.4%               | 26.2%                    | 0.24             |
| Region 6: AR, LA, NM, OK, TX                                       | 14.4%               | 13.0%                    | -0.04            |
| Region 7: IA, KS, MO, NE                                           | 6.7%                | 7.8%                     | 0.04             |
| Region 8: CO, MT, ND, SD, UT, WY                                   | 1.3%                | 3.2%                     | 0.13             |
| Region 9: AZ, CA, HI, NV, AS, FS, GU, PU                           | 2.7%                | 3.3%                     | 0.03             |
| Region 10: AK, ID, OR, WA                                          | 6.6%                | 6.0%                     | -0.02            |

<sup>1</sup> SMD (absolute)  $\geq 0.1$  indicates significance ; HMO = health maintenance organization; POS = point-of-service, PPO = preferred provider organization; QIVc = cell-based quadrivalent influenza vaccine; QIVe-SD = standard-dose egg-based quadrivalent influenza vaccine; SD = standard deviation; SMD = standardized mean difference

Supplementary Table 2. Baseline Clinical Characteristics – Unadjusted

| Characteristic                                                       | QIVc<br>(N=665,047) | QIVe-SD<br>(N=3,062,843) | SMD <sup>1</sup> |
|----------------------------------------------------------------------|---------------------|--------------------------|------------------|
| <b>Month of flu vaccine (%)</b>                                      |                     |                          |                  |
| August                                                               | 0.2%                | 2.0%                     | 0.18             |
| September                                                            | 13.8%               | 19.1%                    | 0.14             |
| October                                                              | 50.2%               | 46.6%                    | -0.07            |
| November                                                             | 20.2%               | 20.9%                    | 0.02             |
| December                                                             | 9.5%                | 7.1%                     | -0.09            |
| January                                                              | 6.0%                | 4.4%                     | -0.08            |
| <b>Charlson Comorbidity Index (CCI) Score: (%)</b>                   |                     |                          |                  |
| 0                                                                    | 81.3%               | 83.7%                    | 0.06             |
| 1                                                                    | 10.5%               | 9.6%                     | -0.03            |
| 2                                                                    | 5.2%                | 4.3%                     | -0.05            |
| 3+                                                                   | 2.9%                | 2.4%                     | -0.04            |
| <b>Mean CCI</b>                                                      | 0.3                 | 0.3                      | -0.07            |
| SD                                                                   | 0.9                 | 0.8                      |                  |
| Median                                                               | 0                   | 0                        |                  |
| <b>Pre-index comorbid conditions of interest (%)</b>                 |                     |                          |                  |
| Asthma                                                               | 3.9%                | 4.2%                     | 0.01             |
| Blood disorders                                                      | 0.1%                | 0.1%                     | 0.00             |
| Chronic lung disease                                                 | 1.9%                | 1.6%                     | -0.02            |
| Diabetes                                                             | 7.8%                | 6.4%                     | -0.05            |
| Heart disease                                                        | 1.8%                | 1.5%                     | -0.03            |
| Kidney disorders                                                     | 1.3%                | 0.9%                     | -0.03            |
| Liver disorders                                                      | 1.8%                | 1.5%                     | -0.03            |
| Neurological or neurodevelopmental conditions                        | 1.6%                | 1.5%                     | -0.01            |
| Weakened immune system <sup>2</sup>                                  | 3.0%                | 2.6%                     | -0.02            |
| IBD                                                                  | 0.7%                | 0.6%                     | -0.01            |
| Composite of the above                                               | 18.8%               | 16.7%                    | -0.05            |
| <b>Patients with pre-index hospitalization (%)</b>                   | 2.3%                | 2.1%                     | -0.01            |
| <b>Number of pre-index hospitalizations</b>                          |                     |                          |                  |
| Mean                                                                 | 0.0                 | 0.0                      | -0.01            |
| SD                                                                   | 0.2                 | 0.2                      |                  |
| Median                                                               | 0                   | 0                        |                  |
| <b>Patients with pre-index ER visit (%)</b>                          | 7.4%                | 7.7%                     | 0.01             |
| <b>Mean number of pre-index ER visits</b>                            | 0.1                 | 0.1                      | 0.01             |
| SD                                                                   | 0.5                 | 0.5                      |                  |
| Median                                                               | 0                   | 0                        |                  |
| <b>Patients with pre-index outpatient physician office visit (%)</b> | 78.0%               | 76.3%                    | -0.04            |
| <b>Mean number of pre-index outpatient physician office visits</b>   | 3.9                 | 3.7                      | -0.06            |
| SD                                                                   | 6.8                 | 6.6                      |                  |
| Median                                                               | 2                   | 2                        |                  |
| <b>Mean total pre-index all-cause outpatient pharmacy costs</b>      | \$1,411             | \$1,268                  | -0.13            |
| SD                                                                   | \$7,666             | \$8,254                  |                  |
| Median                                                               | \$87                | \$56                     |                  |
| <b>Total pre-index all-cause medical costs</b>                       |                     |                          |                  |
| <b>Mean inpatient</b>                                                | \$640               | \$624                    | -0.01            |

|                                                         |          |          |       |
|---------------------------------------------------------|----------|----------|-------|
| SD                                                      | \$7,735  | \$8,349  |       |
| Median                                                  | \$0      | \$0      |       |
| <b>Mean outpatient</b>                                  | \$1,963  | \$1,840  | -0.05 |
| SD                                                      | \$7,811  | \$6,727  |       |
| Median                                                  | \$485    | \$441    |       |
| <b>Mean ER</b>                                          | \$133    | \$132    | 0.01  |
| SD                                                      | \$931    | \$947    |       |
| Median                                                  | \$0      | \$0      |       |
| <b>Mean TOTAL pre-index all-cause costs<sup>3</sup></b> | \$4,014  | \$3,732  | -0.08 |
| SD                                                      | \$15,476 | \$15,391 |       |
| Median                                                  | \$788    | \$674    |       |

<sup>1</sup> SMD (absolute)  $\geq 0.1$  indicates significance

<sup>2</sup> Including: HIV/AIDS; metastatic cancer and acute leukemia; lung or upper digestive or other severe cancer; lymphatic, head, neck, brain, or major cancer; breast, prostate, colorectal, or other cancer; and disorders of immunity

<sup>3</sup> TOTAL = outpatient pharmacy + inpatient + outpatient medical

CCI = Charlson comorbidity index score; ER = emergency room; IBD = inflammatory bowel diseases (ulcerative colitis and Crohn's disease); IPTW = inverse probability of treatment weighting; QIVc = cell-based quadrivalent influenza vaccine; QIVe-SD = standard-dose egg-based quadrivalent influenza vaccine; SD = standard deviation; SMD = standardized mean difference

**Supplementary Table 3. Unadjusted rVEs**

| <i>Subgroup</i>                                              | <b>Overall<br/>(4-64 years)</b> |                     | <b>4-17 years</b> |                | <b>18-64 years</b> |                | <b>High-risk<br/>(4-64 years)</b> |                |
|--------------------------------------------------------------|---------------------------------|---------------------|-------------------|----------------|--------------------|----------------|-----------------------------------|----------------|
|                                                              | <b>rVE</b>                      | <b>P-<br/>value</b> | <b>rVE</b>        | <b>p-value</b> | <b>rVE</b>         | <b>p-value</b> | <b>rVE</b>                        | <b>p-value</b> |
| <b>All-cause hospitalizations</b>                            | -6.7%                           | <.0001              | 14.5%             | 0.0004         | 8.9%               | <.0001         | 1.6%                              | 0.0726         |
| <b>Influenza-related hospitalizations and ER visits</b>      | -14.3%                          | <.0001              | 6.3%              | 0.4718         | -0.9%              | 0.6475         | -4.7%                             | 0.0867         |
| <b>Respiratory hospitalization / ER events</b>               |                                 |                     |                   |                |                    |                |                                   |                |
| Any respiratory hospitalization/ER visit                     | 6.3%                            | <.0001              | 22.2%             | <.0001         | 8.1%               | <.0001         | 7.7%                              | <.0001         |
| Pneumonia hospitalizations/ER visits                         | -4.5%                           | 0.0553              | 32.9%             | 0.0002         | 3.6%               | 0.1252         | -0.1%                             | 0.9624         |
| Asthma/COPD/bronchial hospitalizations/ER visits             | 3.4%                            | 0.0043              | 20.2%             | <.0001         | 10.1%              | <.0001         | 9.0%                              | <.0001         |
| <b>Influenza-related hospitalizations and ER visits - SA</b> | 19.4%                           | <.0001              | 21.4%             | 0.0049         | 7.8%               | 0.0430         | 14.1%                             | 0.0054         |
| <b>UTI hospitalizations/ER visits</b>                        | 6.9%                            | <.0001              | 22.4%             | <.0001         | 7.0%               | <.0001         | 6.1%                              | <.0001         |

\*SA = *Sensitivity Analysis*

**Supplementary Table 4. Adjusted Clinical Outcomes Rates (Rates per 1,000)**

| <i>Age group</i>                                    | <b>Overall</b> |                | <b>4-17 Years</b> |                | <b>18-64 years</b> |                | <b>High-risk</b> |                |
|-----------------------------------------------------|----------------|----------------|-------------------|----------------|--------------------|----------------|------------------|----------------|
| <i>Study Cohort</i>                                 | <b>QIVc</b>    | <b>QIVe-SD</b> | <b>QIVc</b>       | <b>QIVe-SD</b> | <b>QIVc</b>        | <b>QIVe-SD</b> | <b>QIVc</b>      | <b>QIVe-SD</b> |
|                                                     | (N=669,030)    | (N=3,062,797)  | (N=74,304)        | (N=839,744)    | (N=590,705)        | (N=2,223,435)  | (N=142,150)      | (N=584,959)    |
| <b>Measure (rate)</b>                               |                |                |                   |                |                    |                |                  |                |
| <b>All-cause hospitalizations</b>                   | 35.6           | 38.7           | 7.1               | 8.6            | 45.3               | 48.5           | 100.0            | 104.1          |
| <b>Influenza-related hospitalizations/ER visits</b> | 1.6            | 1.7            | 2.3               | 2.5            | 1.3                | 1.4            | 3.2              | 3.2            |
| <b>Respiratory hospitalization/ER events</b>        |                |                |                   |                |                    |                |                  |                |
| Any respiratory hospitalization/ER visit            | 21.8           | 23.7           | 16.9              | 19.8           | 23.2               | 25.0           | 56.0             | 59.0           |
| Pneumonia hospitalizations/ER visits                | 3.2            | 3.4            | 1.4               | 1.8            | 3.8                | 4.0            | 9.4              | 9.7            |
| Asthma/COPD/bronchial hospitalizations/ER visits    | 11.5           | 12.8           | 6.8               | 8.0            | 13.0               | 14.3           | 36.9             | 39.2           |
| <b>UTI hospitalizations/ER visits</b>               | 4.9            | 5.0            | 1.8               | 2.0            | 6.0                | 6.0            | 11.5             | 11.6           |

*Rate = events (first event only) per 1,000 vaccinated-subject seasons*
